# Supplementary material
Source: PubMed Central journal article supplement (PMC8043762)
Supplement: 216_2021_3302_MOESM1_ESM.pdf [file 216_2021_3302_MOESM1_ESM.pdf]

# **Analytical and Bioanalytical Chemistry**

## **Supplementary Information**

### **An integrated strategy of MS-network- based offline 2DLC-QTOF-MS/MS coupled with UHPLC-QTRAP<sup>®</sup>-MS/MS for the characterization and quantification of the non-polysaccharides in Sijunzi Decoction**

Bangjian Dong<sup>1</sup>, Chongsheng Peng<sup>1</sup>, Ping Ma, Xiaobo Li\*

School of Pharmacy, Shanghai Jiao Tong University, No. 800 Dongchuan Road, Minhang  
District, Shanghai, 200240, China

## **Index of Contents**

**Fig. S1** The first dimensional separation: HPLC-DAD chromatograms of NPSs in SJZD (A) at 210 nm; (B) at 254 nm.

**Fig. S2** Comparison of the separation selectivity of four RP columns for SJZD components using CH<sub>3</sub>CN-0.1% water-containing formic acid for as the mobile phase (data recorded on an Agilent UHPLC-QTOF-MS instrument. Sample A was used for optimization. a is liquiritin; b is liquiritin apioside ).

**Fig. S3** Base peak intensity chromatograms (BPCs) in negative and positive ion mode of Fractions 1–5.

**Fig. S4** Tandem mass spectra of six potential new compounds **A25** (A), **A52**(B), **C73** (C), **C94** (D), **C154** (E), and **C210** (F).

**Fig. S5** Representative MRM chromatograms of 19 analytes from Sample B1 (A) and Sample B2 (B).

**Table S1** UHPLC-QTRAP<sup>®</sup>-MS/MS parameters for the quantification.

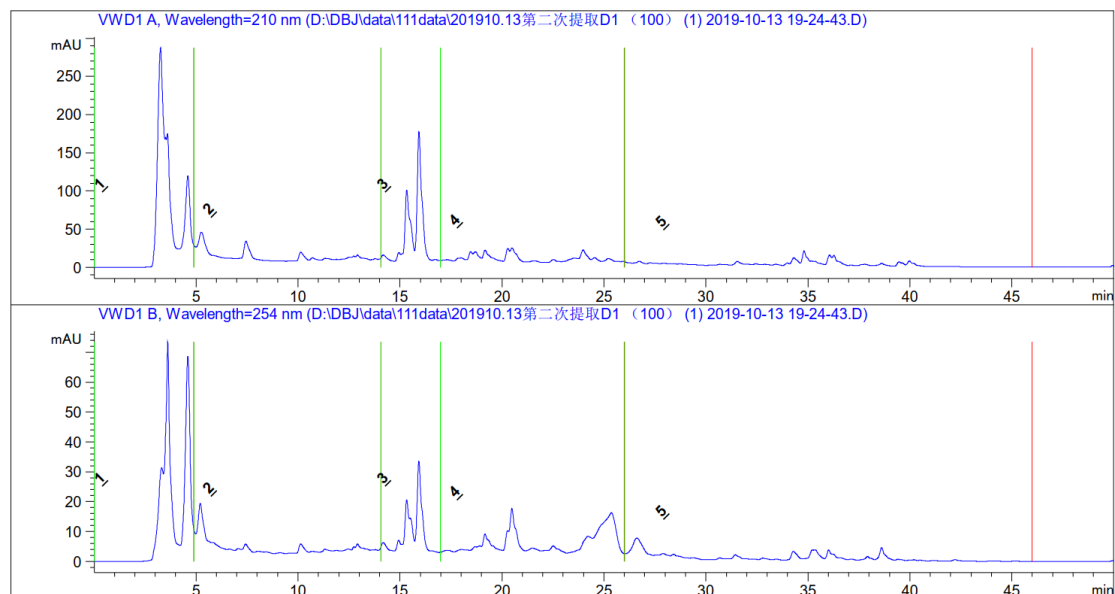

**Fig. S1** The first dimensional separation: HPLC-DAD chromatograms of NPS in SJZD (A) at 210 nm; (B) at 254 nm.

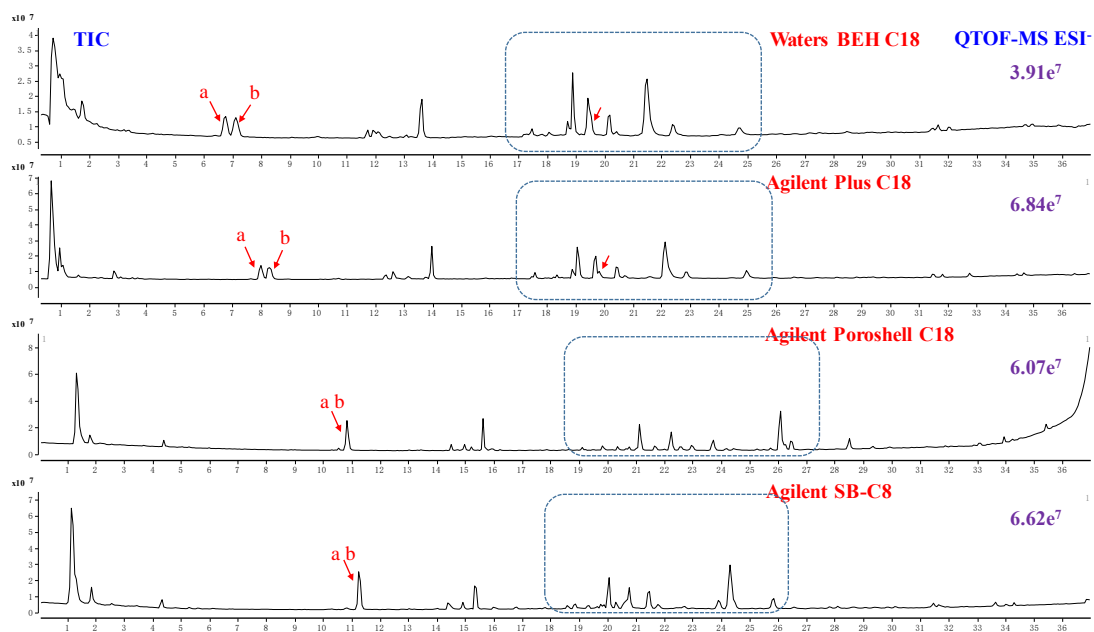

**Fig. S2** Comparison of the separation selectivity of four RP columns for SJZD components using  $\text{CH}_3\text{CN}$ -0.1% water-containing formic acid for as the mobile phase (data was recorded on an Agilent UHPLC-QTOF-MS instrument. Sample A was used for optimization. a is liquiritin; b is liquiritin apioside).

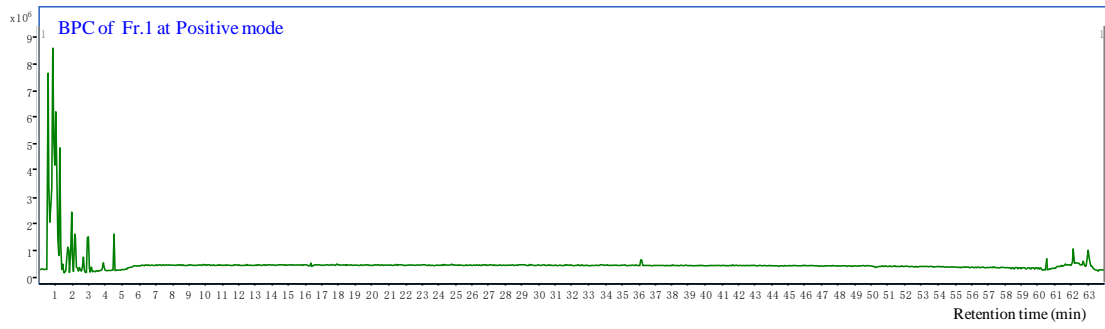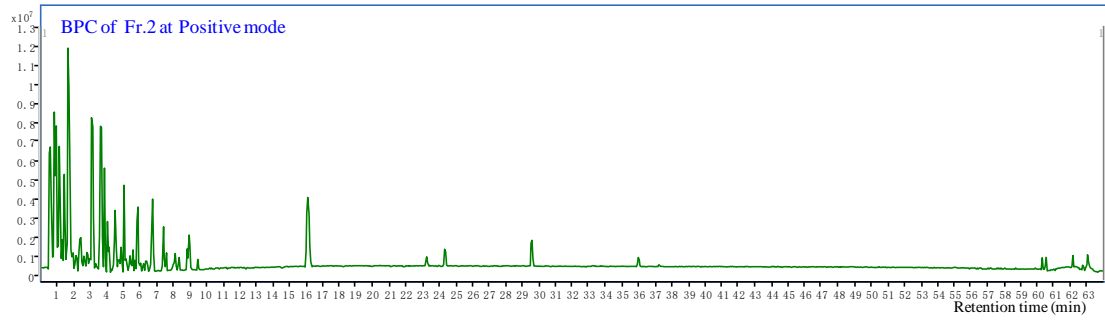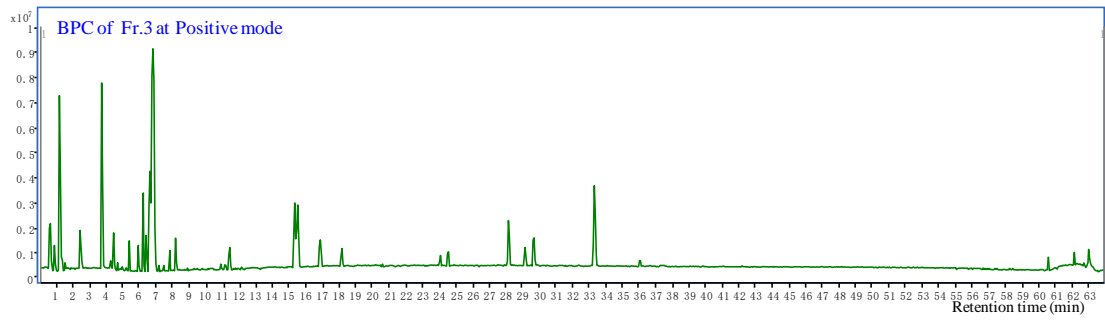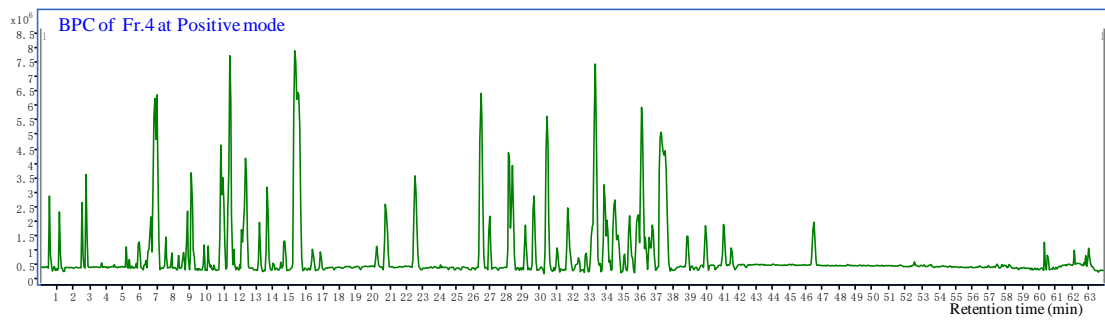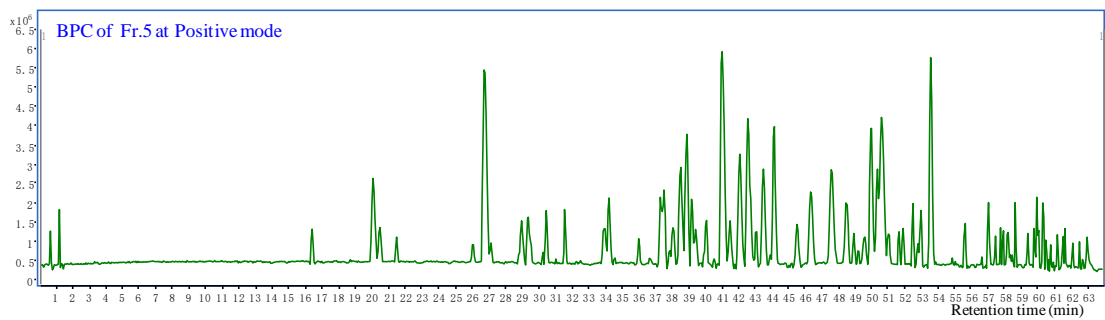

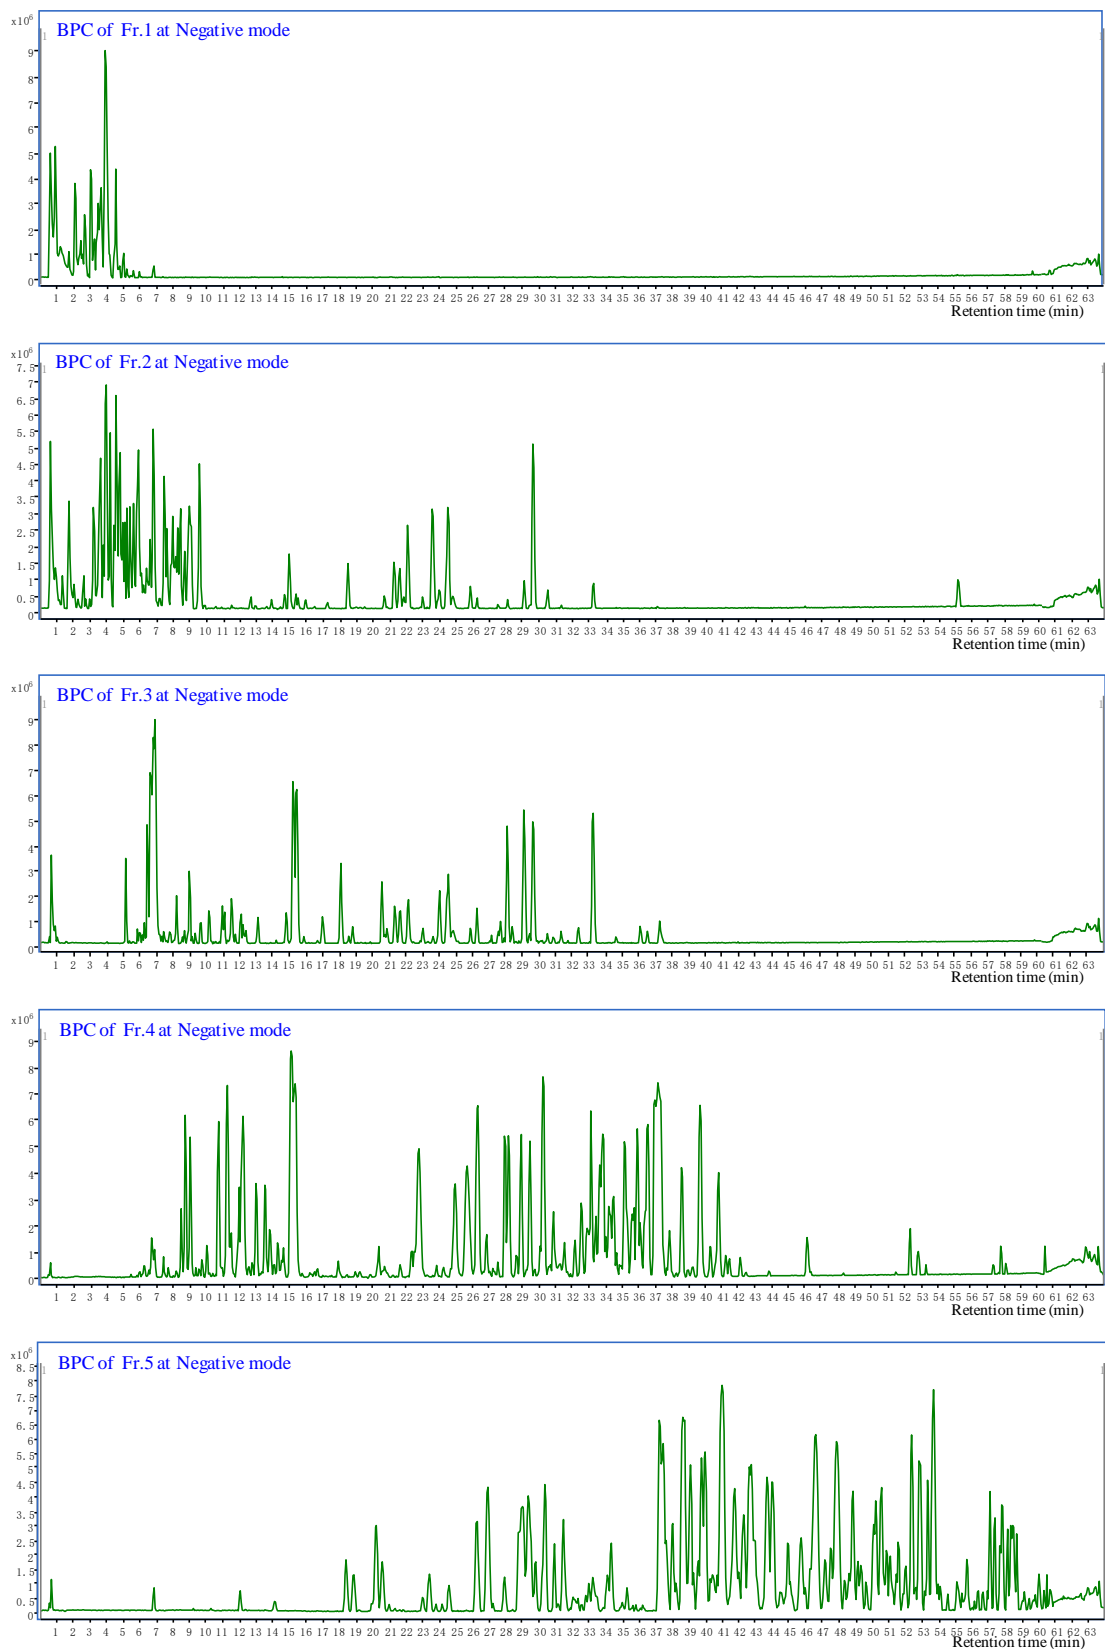

**Fig. S3** Base peak intensity chromatograms (BPCs) in positive and negative ion mode of Fractions 1–5.

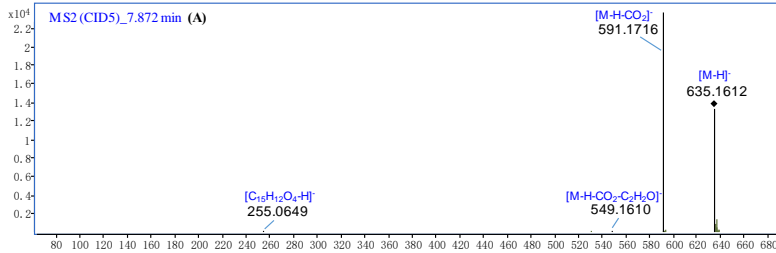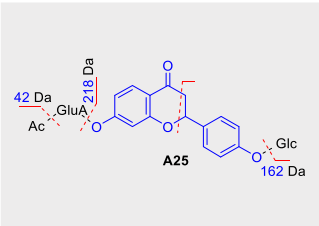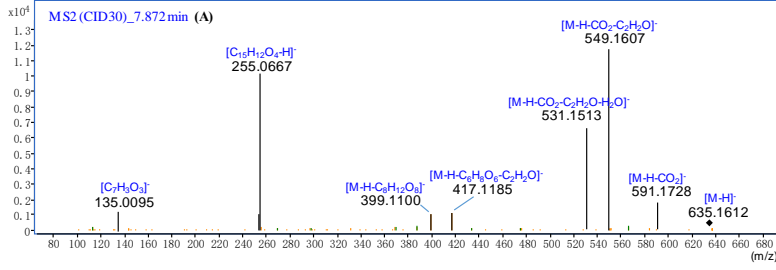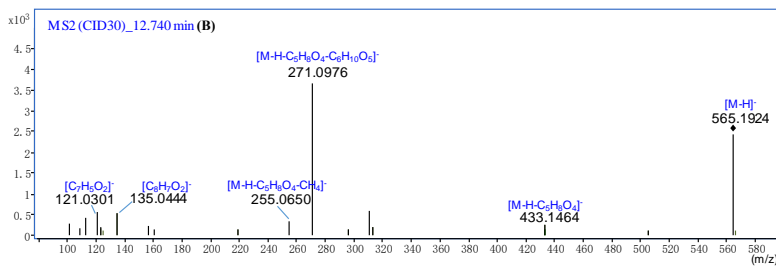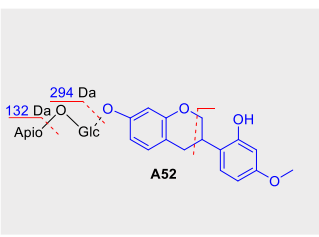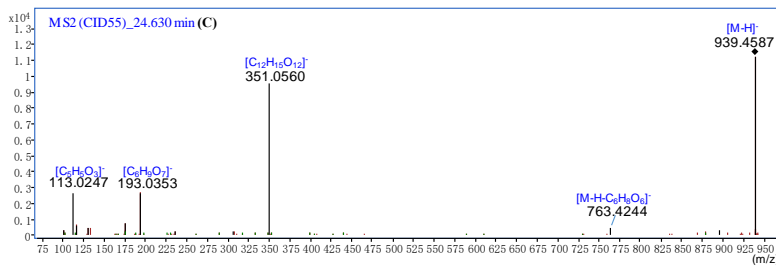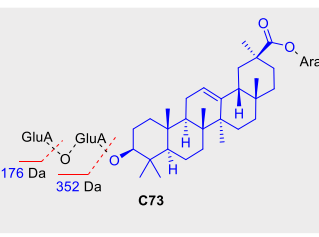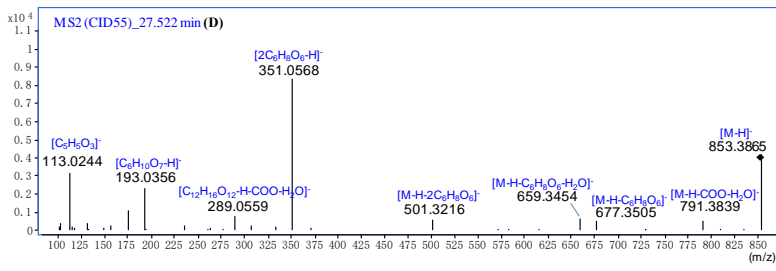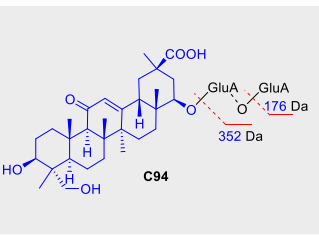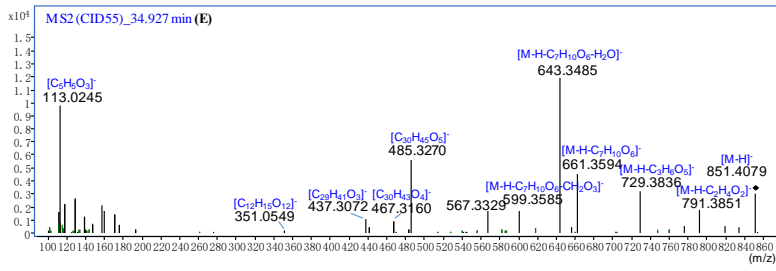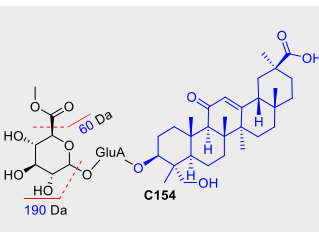

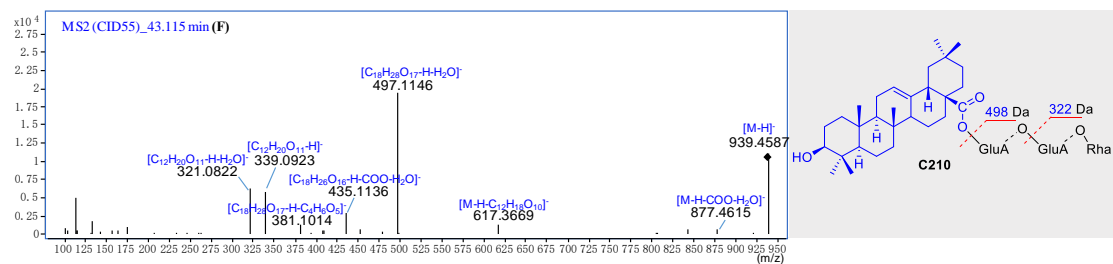

**Fig. S4** Tandem mass spectra of six potential new compounds **A25** (A), **A52**(B), **C73** (C), **C94** (D), **C154** (E), and **C210** (F).

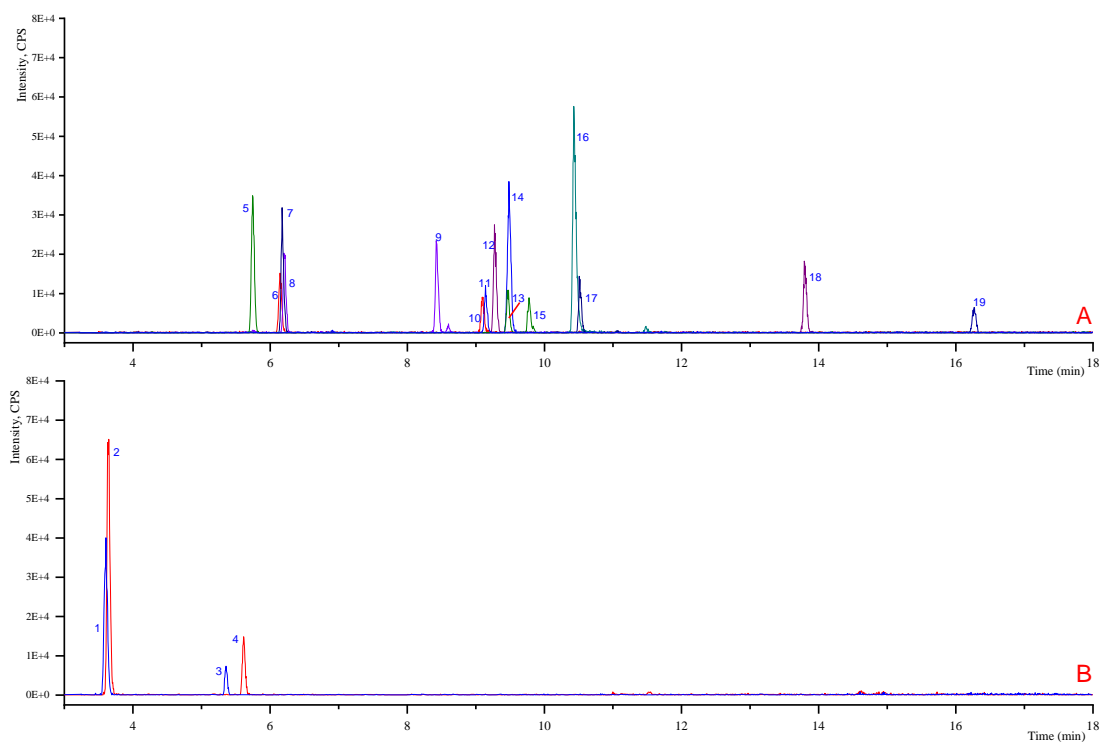

**Fig. S5** Representative MRM chromatograms of 19 analytes from Sample B1 (A) and Sample B2 (B).

**Table S1** UHPLC/QTRAP<sup>®</sup>-MS/MS parameters for the quantification.

| NO. | Compound               | Formula                                         | RT<br>(min) | Quantifier<br>( <i>m/z</i> ) | Qualifier<br>( <i>m/z</i> ) | CE <sup>a</sup><br>(eV) | DP<br>(eV) | CXP<br>(eV) |
|-----|------------------------|-------------------------------------------------|-------------|------------------------------|-----------------------------|-------------------------|------------|-------------|
| 1   | Liquiritin apioside    | C <sub>26</sub> H <sub>30</sub> O <sub>13</sub> | 3.59        | 549.2→255.1                  | 549.2→135.0                 | -50                     | -100       | -15         |
| 2   | Liquiritin             | C <sub>21</sub> H <sub>22</sub> O <sub>9</sub>  | 3.63        | 417.1→255.1                  | 417.1→135.0                 | -28                     | -100       | -15         |
| 3   | Isoliquiritin apioside | C <sub>26</sub> H <sub>30</sub> O <sub>13</sub> | 5.35        | 549.2→255.1                  | 549.2→135.0                 | -50                     | -100       | -15         |
| 4   | Isoliquiritin          | C <sub>21</sub> H <sub>22</sub> O <sub>9</sub>  | 5.60        | 417.1→255.1                  | 417.1→135.0                 | -28                     | -100       | -15         |
| 5   | Ononin                 | C <sub>22</sub> H <sub>22</sub> O <sub>9</sub>  | 5.75        | 475.1→267.1                  | 475.1→252.0                 | -30                     | -100       | -15         |
| 6   | Liquiritigenin         | C <sub>15</sub> H <sub>12</sub> O <sub>4</sub>  | 6.15        | 255.1→135.0                  | 255.1→119.2                 | -30                     | -100       | -15         |
| 7   | Ginsenoside Re         | C <sub>48</sub> H <sub>82</sub> O <sub>18</sub> | 6.17        | 991.6→945.5                  | 991.6→799.5                 | -30                     | -100       | -15         |
| 8   | Ginsenoside Rg1        | C <sub>42</sub> H <sub>72</sub> O <sub>14</sub> | 6.20        | 845.5→799.5                  | 845.5→637.6                 | -30                     | -100       | -15         |
| 9   | Ginsenoside Rf         | C <sub>42</sub> H <sub>72</sub> O <sub>14</sub> | 8.42        | 845.5→799.5                  | 845.5→637.6                 | -30                     | -100       | -15         |
| 10  | Isoliquiritigenin      | C <sub>15</sub> H <sub>12</sub> O <sub>4</sub>  | 9.10        | 255.1→135.0                  | 255.1→119.2                 | -30                     | -100       | -15         |
| 11  | Ginsenoside Rb1        | C <sub>54</sub> H <sub>92</sub> O <sub>23</sub> | 9.12        | 1153.6→1107.6                | 1153.6→945.5                | -30                     | -100       | -15         |
| 12  | Ginsenoside Rg2        | C <sub>42</sub> H <sub>72</sub> O <sub>13</sub> | 9.22        | 829.5→783.5                  | 829.5→637.6                 | -30                     | -100       | -15         |
| 13  | Ginsenoside Rc         | C <sub>53</sub> H <sub>90</sub> O <sub>22</sub> | 9.46        | 1123.6→1077.6                | 1123.6→945.5                | -30                     | -100       | -15         |
| 14  | Formononetin           | C <sub>16</sub> H <sub>12</sub> O <sub>4</sub>  | 9.48        | 267.1→252.0                  | 267.1→223.0                 | -30                     | -100       | -15         |
| 15  | Ginsenoside Rb2        | C <sub>53</sub> H <sub>90</sub> O <sub>22</sub> | 9.76        | 1123.6→1077.6                | 1123.6→945.5                | -30                     | -100       | -15         |
| 16  | Glycyrrhizic acid      | C <sub>42</sub> H <sub>62</sub> O <sub>16</sub> | 10.43       | 821.4→351.1                  | 821.4→193.1                 | -58                     | -100       | -15         |
| 17  | Ginsenoside Rd         | C <sub>48</sub> H <sub>82</sub> O <sub>18</sub> | 10.51       | 991.6→945.5                  | 991.6→783.5                 | -30                     | -100       | -15         |
| 18  | Ginsenoside Rg3        | C <sub>42</sub> H <sub>72</sub> O <sub>13</sub> | 13.75       | 829.5→783.5                  | 829.5→621.5                 | -30                     | -100       | -15         |
| 19  | Ginsenoside Rk1        | C <sub>42</sub> H <sub>70</sub> O <sub>12</sub> | 16.26       | 811.5→765.5                  | 811.5→161.3                 | -30                     | -100       | -15         |

<sup>a</sup> the CE values was applied for quantifier ions
